# Supplementary material
Source: PubMed Central journal article supplement (PMC2787466)

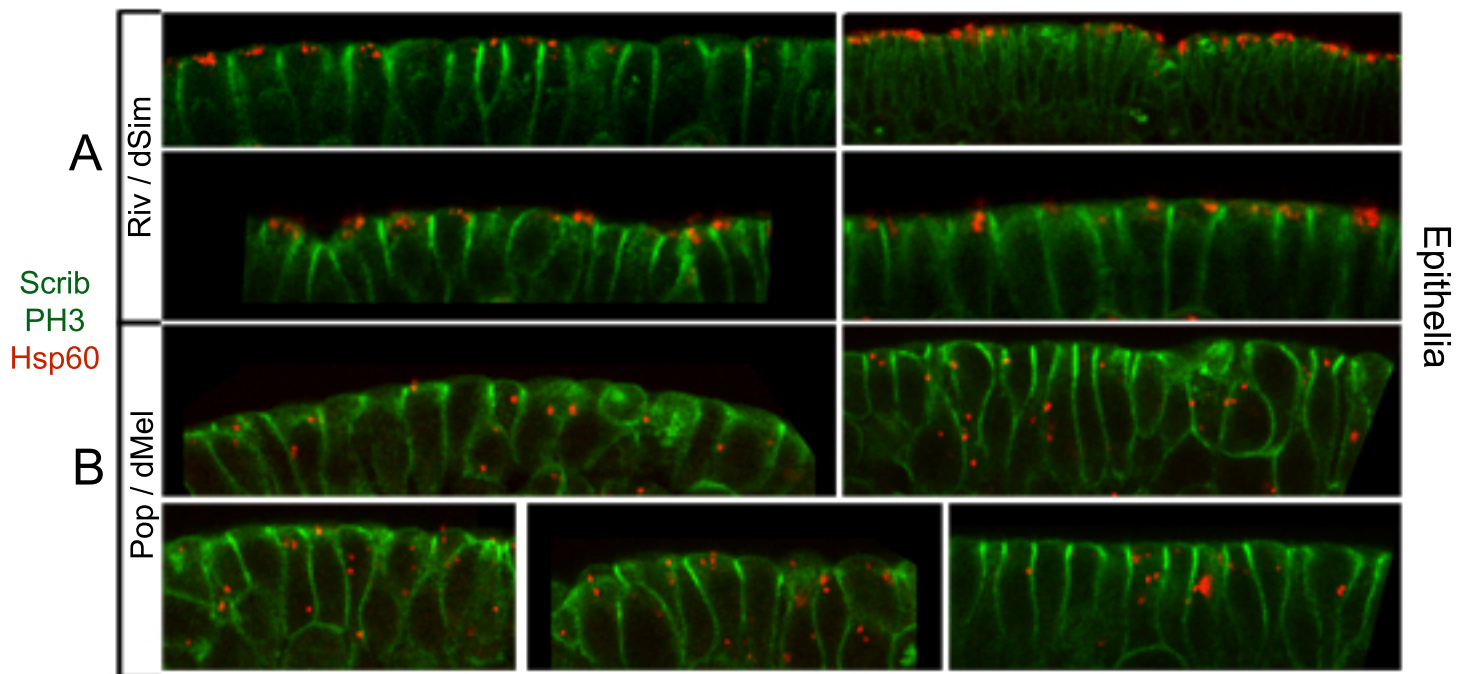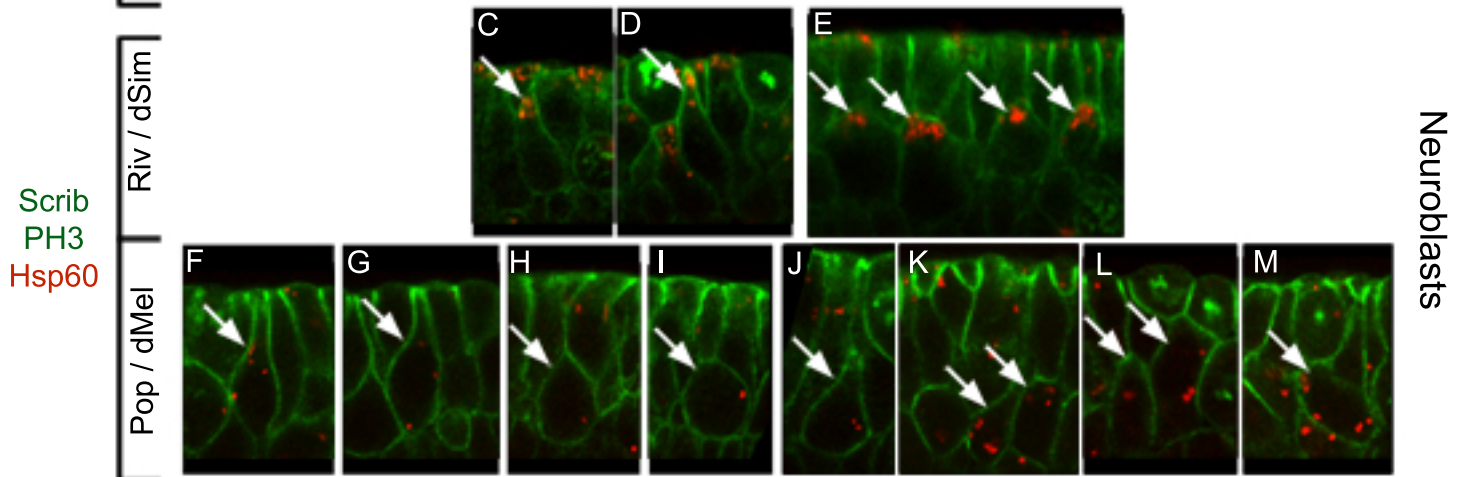

Supplement: supp_122_24_4570__1.pdf [file supp_122_24_4570__1.pdf]
